# Supplementary material for: Systematic detection of brain protein-coding genes under positive selection during primate evolution and their roles in cognition
Source: bioRxiv or medRxiv preprint supplement (doi:10.1101/658658), 2021-01-10
Supplement: Supplementary file [file media-7.pdf]

|                                                                         | Studies with brain activity maps correlated with pattern of expression of the divergent genes |                                |                             |
|-------------------------------------------------------------------------|-----------------------------------------------------------------------------------------------|--------------------------------|-----------------------------|
|                                                                         | Cortex                                                                                        | Subcortical structures         | Both                        |
| <b>All studies</b><br>N=19244<br>Social: 7184 (37.33%)                  | N=1309<br>Social: 655 (50.04%)                                                                | N=1298<br>Social: 503 (38.75%) | N=95<br>Social: 47 (49.47%) |
| <b>Studies with multiple subjects</b><br>N=2569<br>Social: 319 (12.41%) | N=96<br>Social: 10 (10.41%)                                                                   | N=228<br>Social: 33 (14.47%)   | N=1<br>Social: 0            |

**Supplementary Table 6.** Summary of the statistically significant correlations between the fMRI statistical maps from *Neurovault* and the expression pattern of divergent genes in either cortex or subcortical structure (bootstrap correcting for GC12 content and CDS length). The column “Both” refer to the number of maps both significantly correlated to cortex and subcortical structures. The grey cell indicates a statistical enrichment for social tasks (Fisher exact test,  $p=2.8e-20$ ).
